# Supplementary material
Source: Springer Nature journal article supplement (https://www.springermedizin.de/resource/supplementary/12943_2010_797_MOESM8_ESM.pdf/9554856)

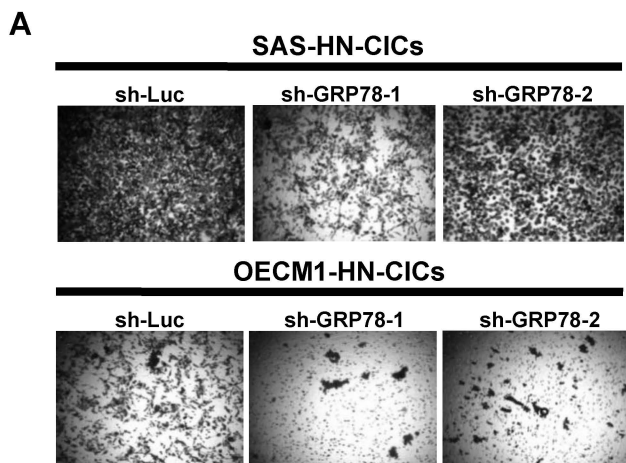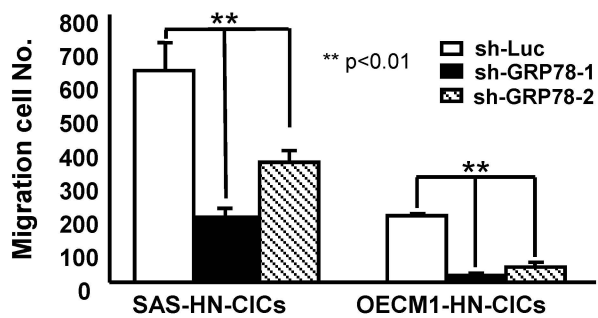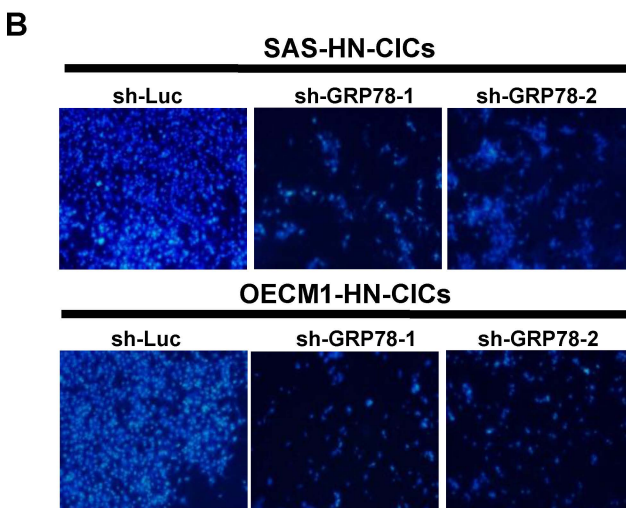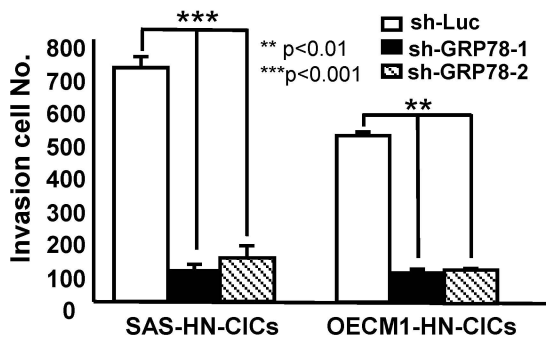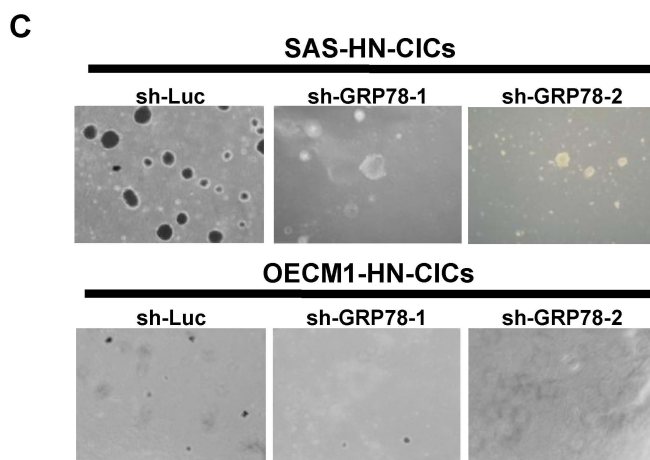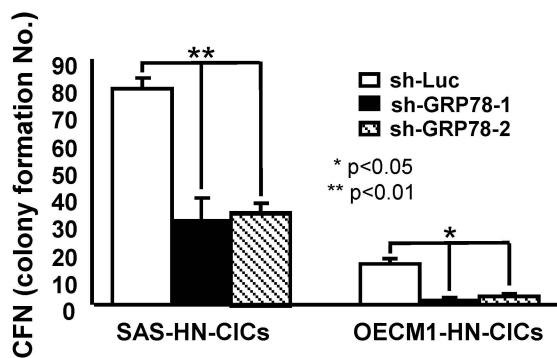

**D**

|                    | 5x 10 <sup>5</sup> | 1x 10 <sup>5</sup> | 1x 10 <sup>4</sup> |
|--------------------|--------------------|--------------------|--------------------|
| HN-CICs-sh-Luc     | 3/3                | 3/3                | 3/3                |
| HN-CICs-sh-GRP78-1 | 2/3                | 0/3                | 0/3                |

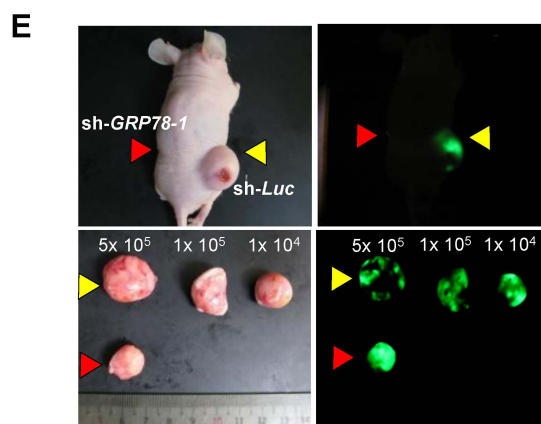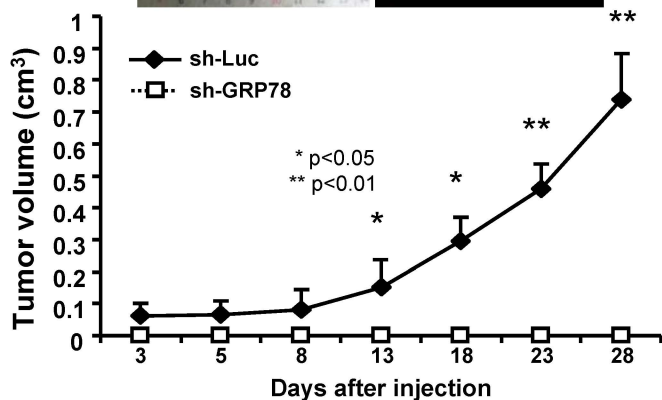

Supplement: MOESM8 [file 9554856]
